# Supplementary material for: Process optimization and kinetics of microwave assisted transesterification of crude glycerol for the production of glycerol carbonate
Source: Royal Society of Chemistry journal article supplement (doi:10.1039/d0se01383h), 2020-11-19
Supplement: d0se01383h1.pdf [file d0se01383h1.pdf]

Supplementary Data:

Table (a) : Influence of molar ratio of DMC/gly on the degree of discrepancy between yield and conversion

| Molar ratio of DMC/gly | Yield     | Conversion | Discrepancy between yield and conversion |
|------------------------|-----------|------------|------------------------------------------|
| 1                      | 70 - 75 % | 40 – 50 %  | 25 -30%                                  |
| 2                      | 90 – 95%  | 70 – 75 %  | 20 %                                     |
| 3                      | 95 – 98 % | 80 – 86 %  | 12 – 15%                                 |
